# Supplementary material for: Evaluation of modelled climatologies of O 3 , CO, water vapour and NO y in the upper troposphere–lower stratosphere using regular in situ observations by passenger aircraft
Source: Copernicus journal article supplement (doi:10.5194/acp-23-14973-2023), 2023-12-06
Supplement: Supplementary file 1 [file acp-23-14973-2023-supplement.pdf]

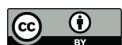

*Supplement of*

**Evaluation of modelled climatologies of O<sub>3</sub>, CO, water vapour and NO<sub>y</sub> in the upper troposphere–lower stratosphere using regular in situ observations by passenger aircraft**

**Yann Cohen et al.**

*Correspondence to:* Yann Cohen ([yann.cohen.09@gmail.com](mailto:yann.cohen.09@gmail.com))

The copyright of individual parts of the supplement might differ from the article licence.

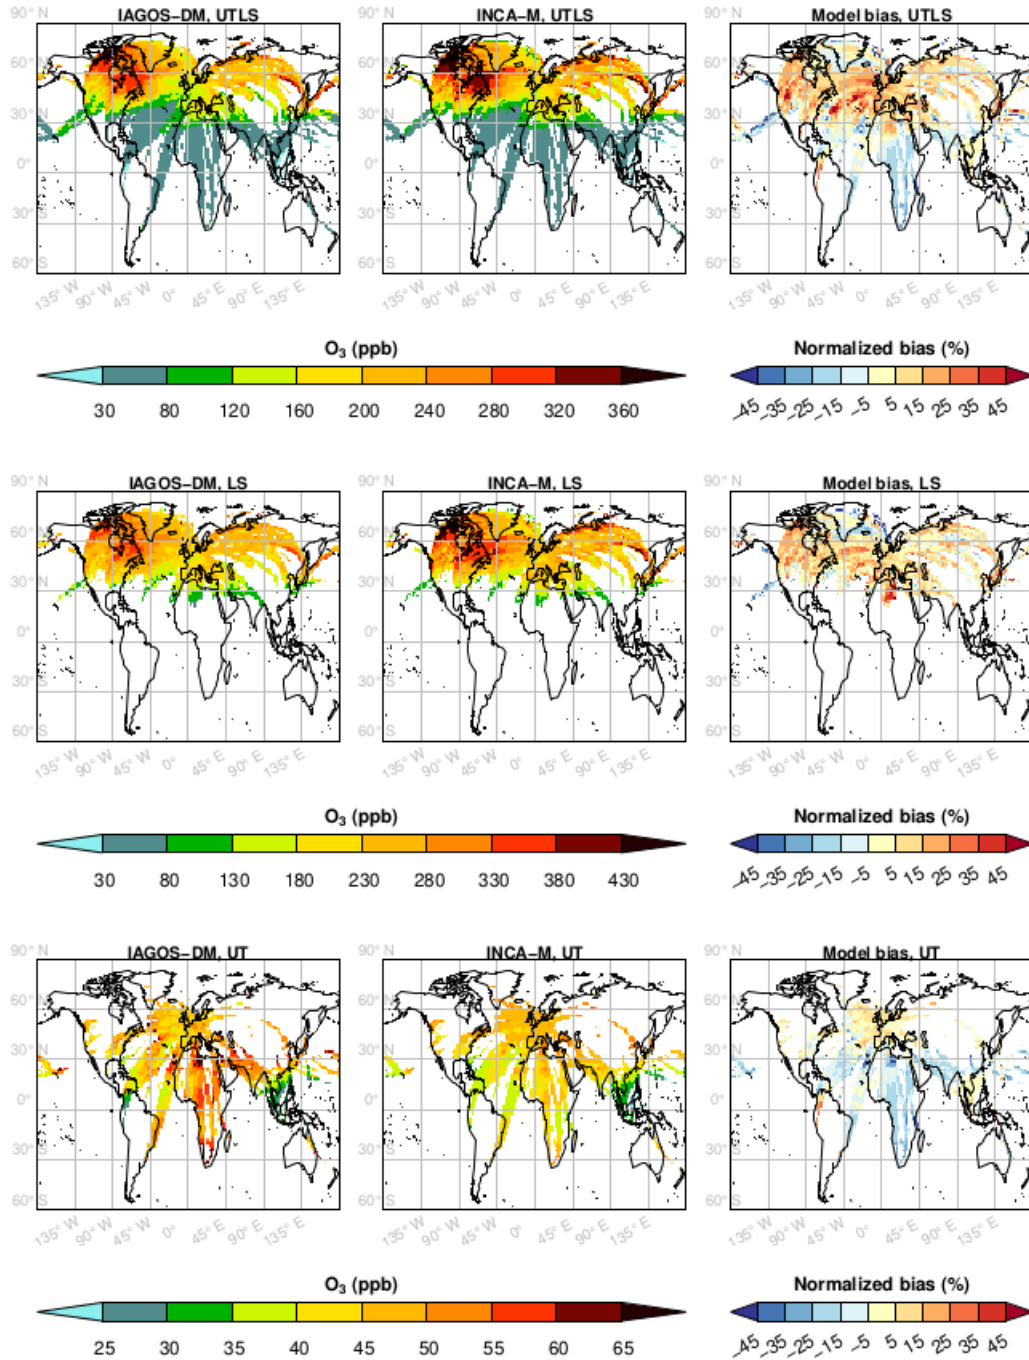

**Figure S1.** Ozone mean horizontal distributions during boreal winter from the end of 1994 until 2017, for the products IAGOS-DM (left) and INCA-M (middle), and the biases (right) normalized with respect to the mean values between the two products. Each row displays a layer, with the non-separated UTLS at the top and the distinct LS and UT below.

## O<sub>3</sub> – MAM

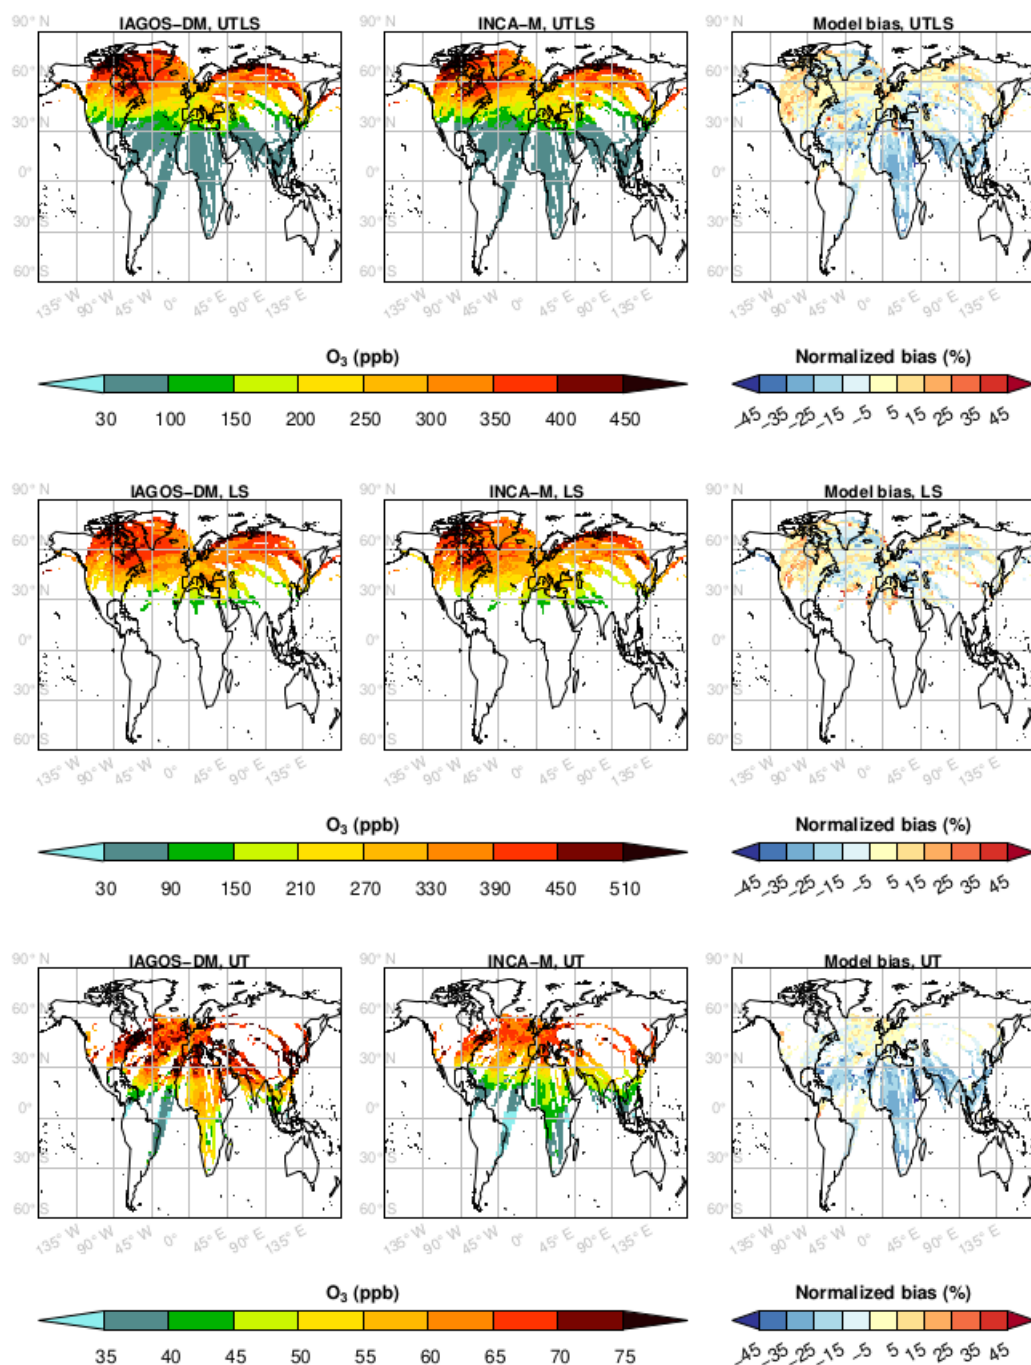

Figure S2. As Fig. S1 for boreal spring.

## O<sub>3</sub> – JJA

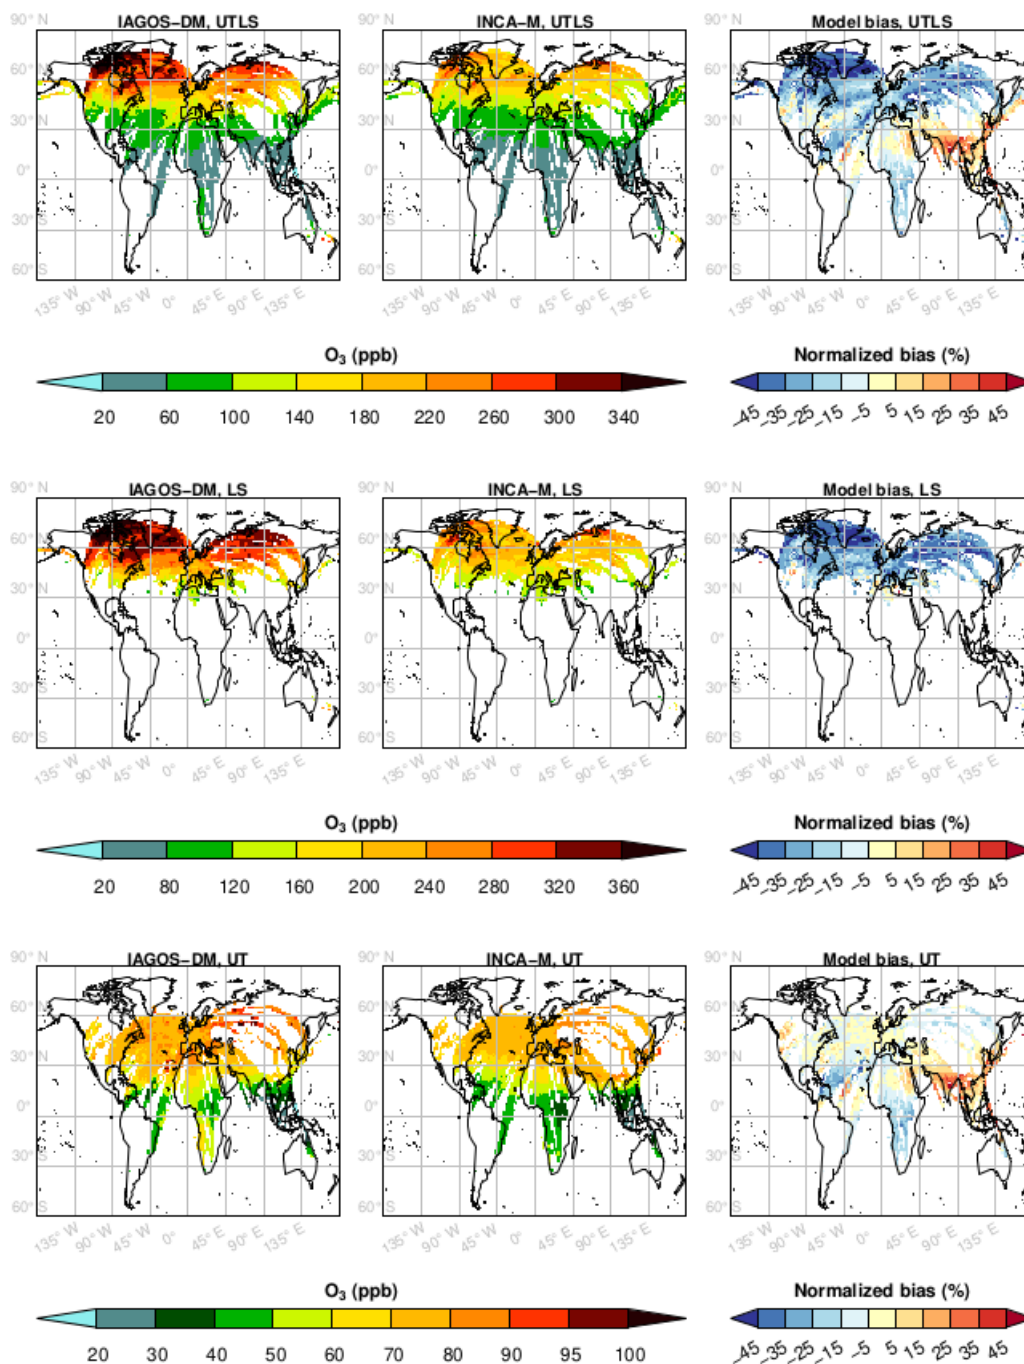

Figure S3. As Fig. S1 for boreal summer.

## O<sub>3</sub> – SON

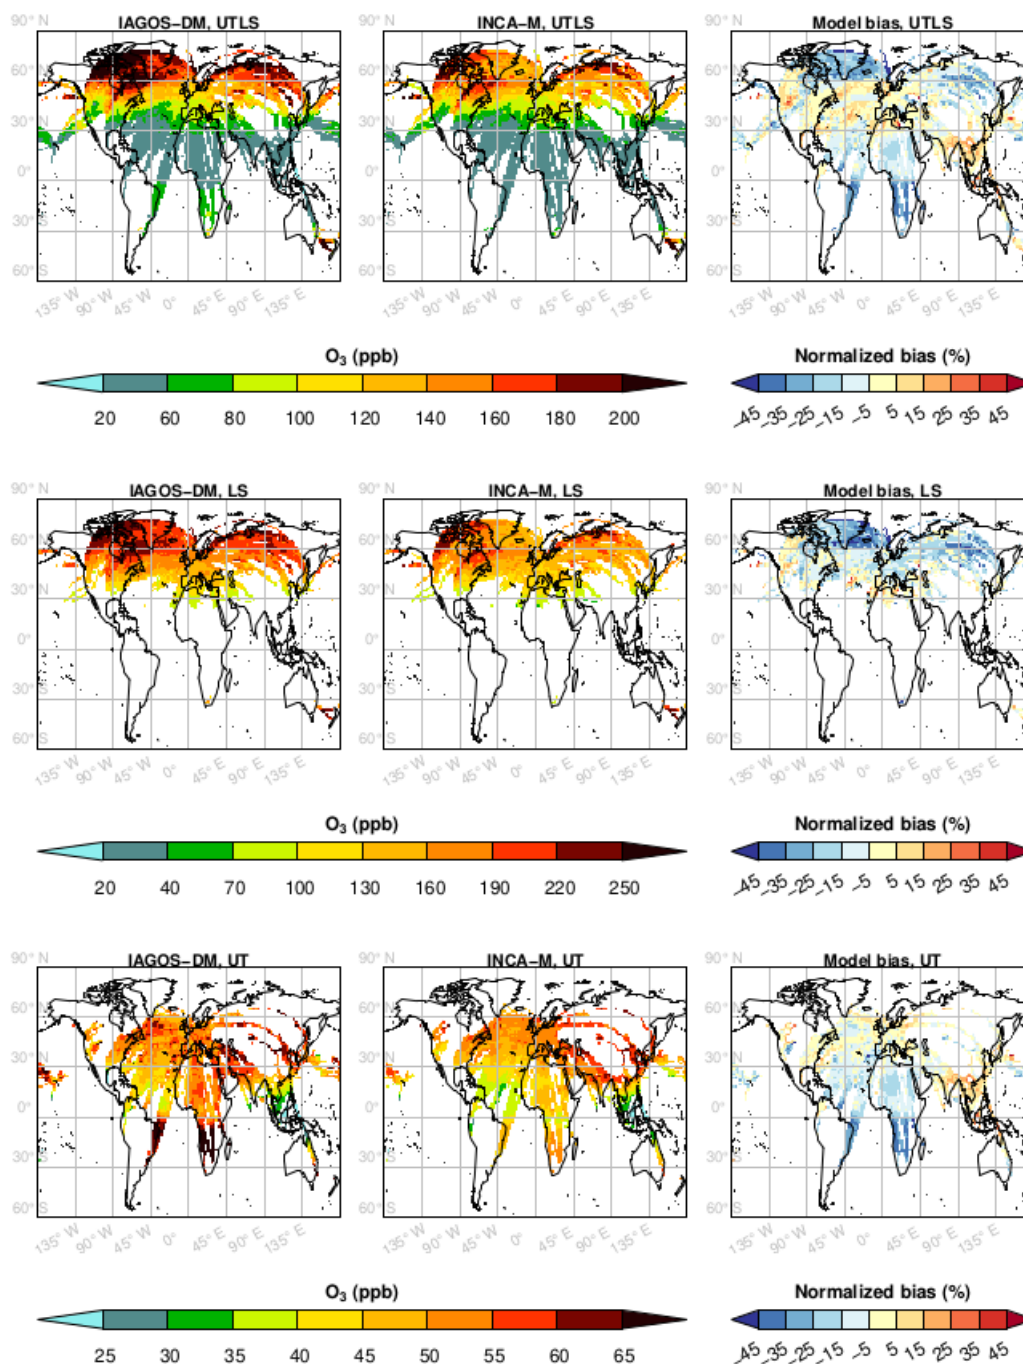

Figure S4. As Fig. S1 for boreal fall.

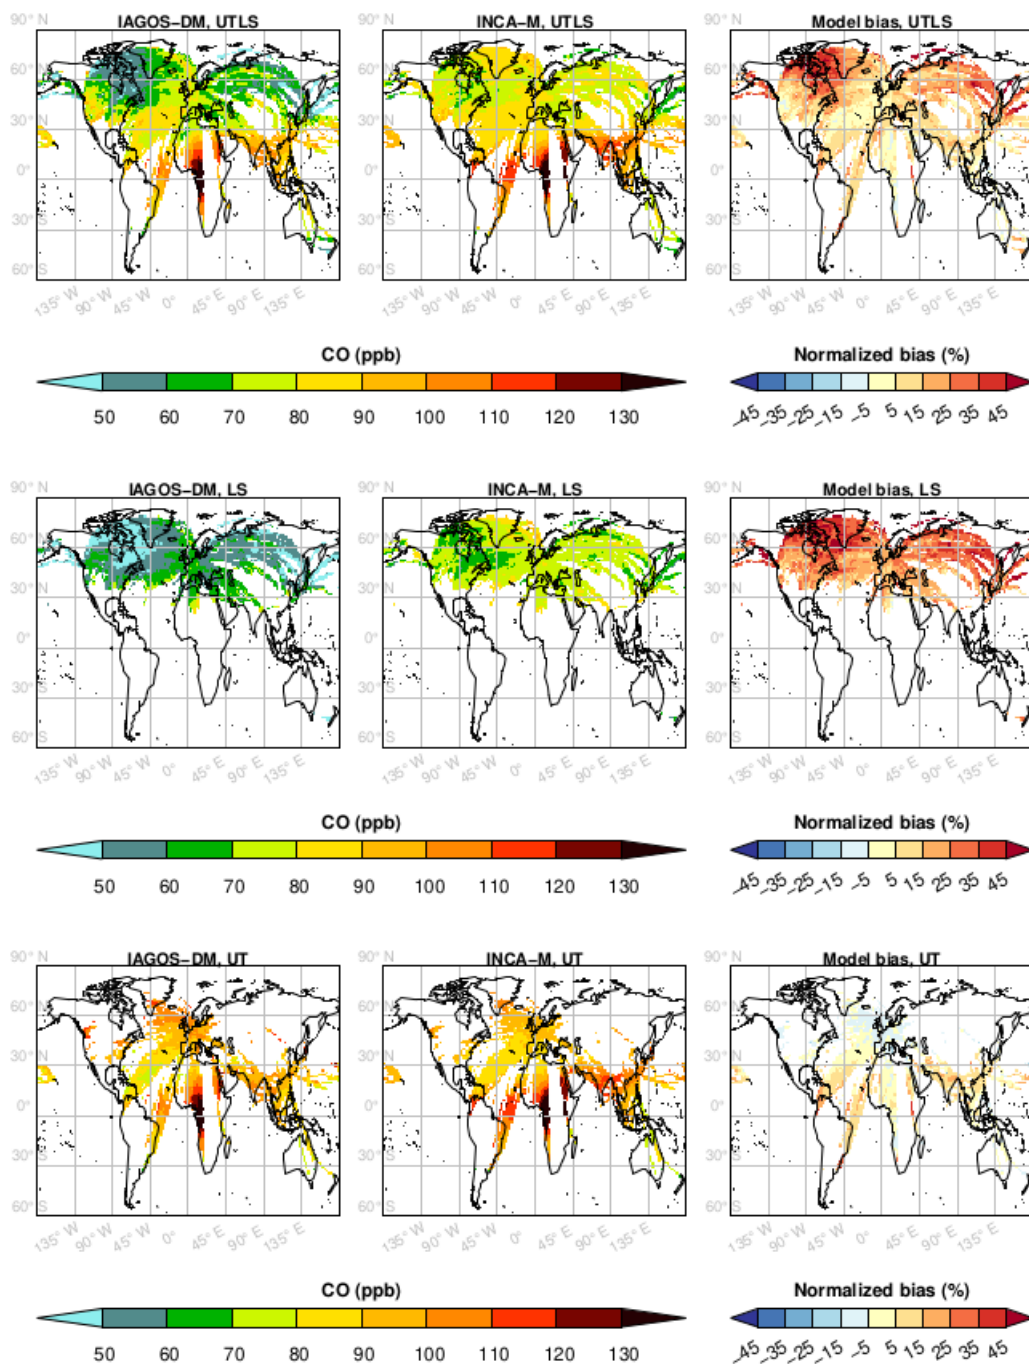

**Figure S5.** CO mean horizontal distributions during boreal winter from the end of 2001 until 2017, for the products IAGOS-DM (left) and INCA-M (middle), and the biases (right) normalized with respect to the mean values between the two products. Each row displays a layer, with the non-separated UTLS at the top and the distinct LS and UT below.

## CO – MAM

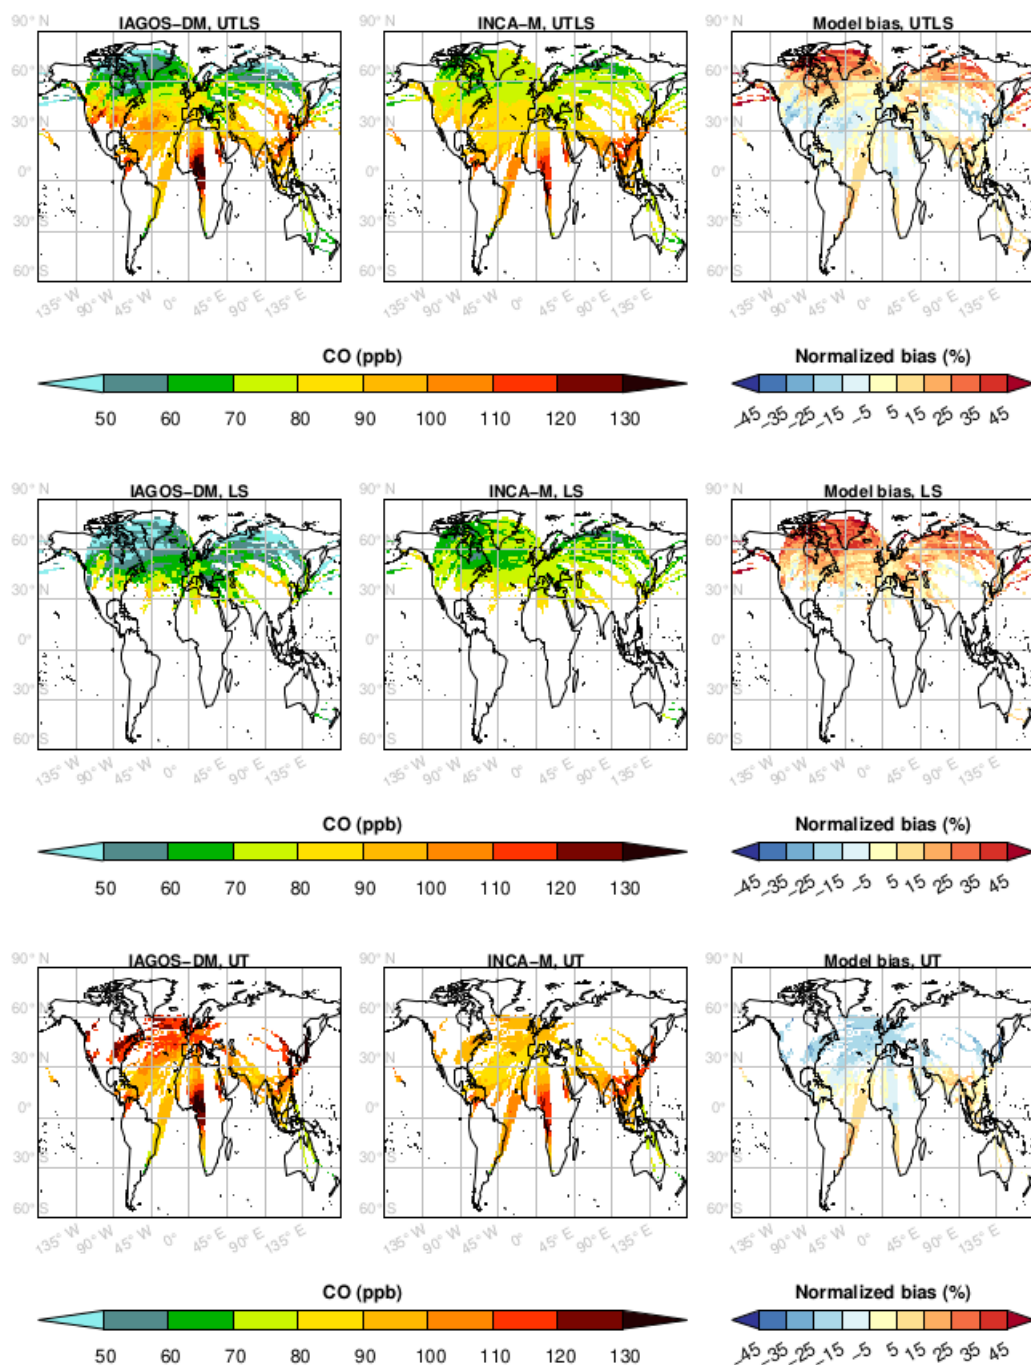

Figure S6. As Fig. S5 for boreal spring.

## CO – JJA

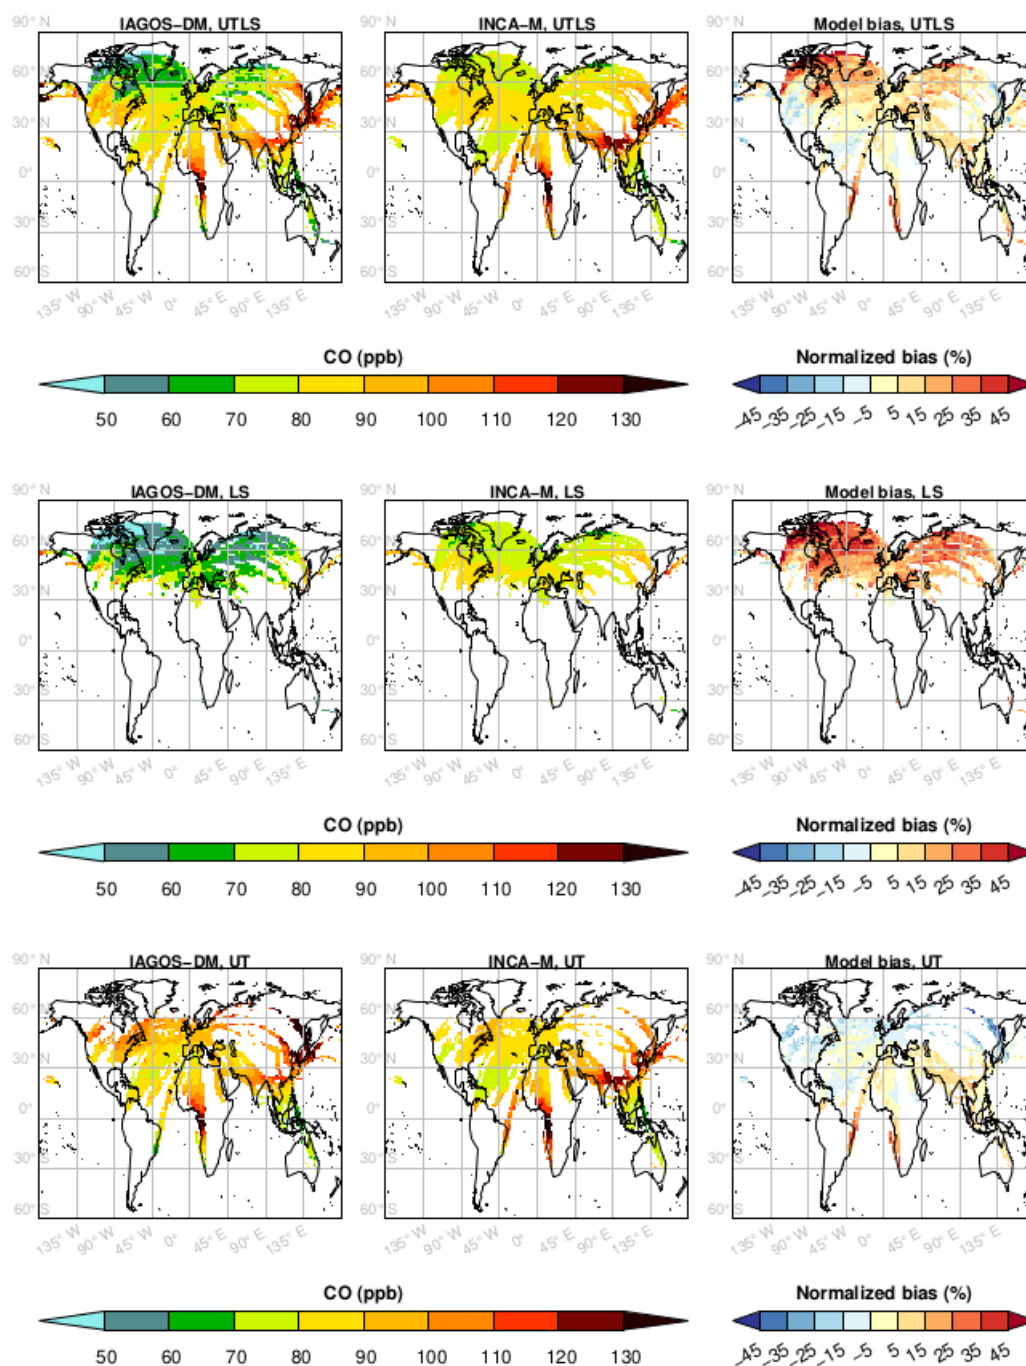

Figure S7. As Fig. S5 for boreal summer.

## CO – SON

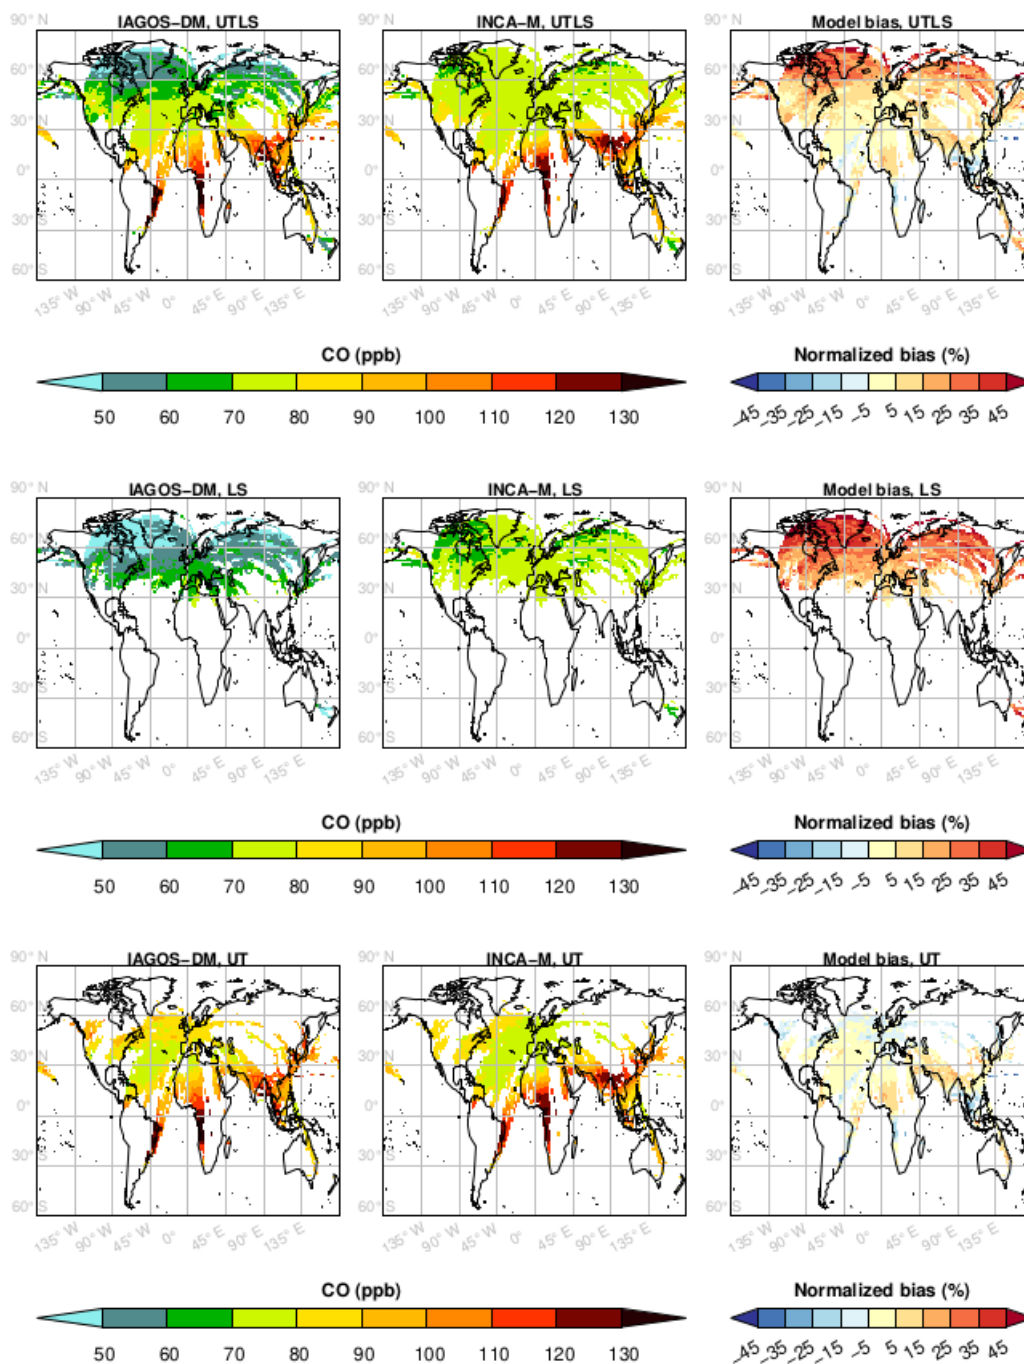

Figure S8. As Fig. S5 for boreal fall.

### S3 Reactive nitrogen

$\text{NO}_y$  – DJF

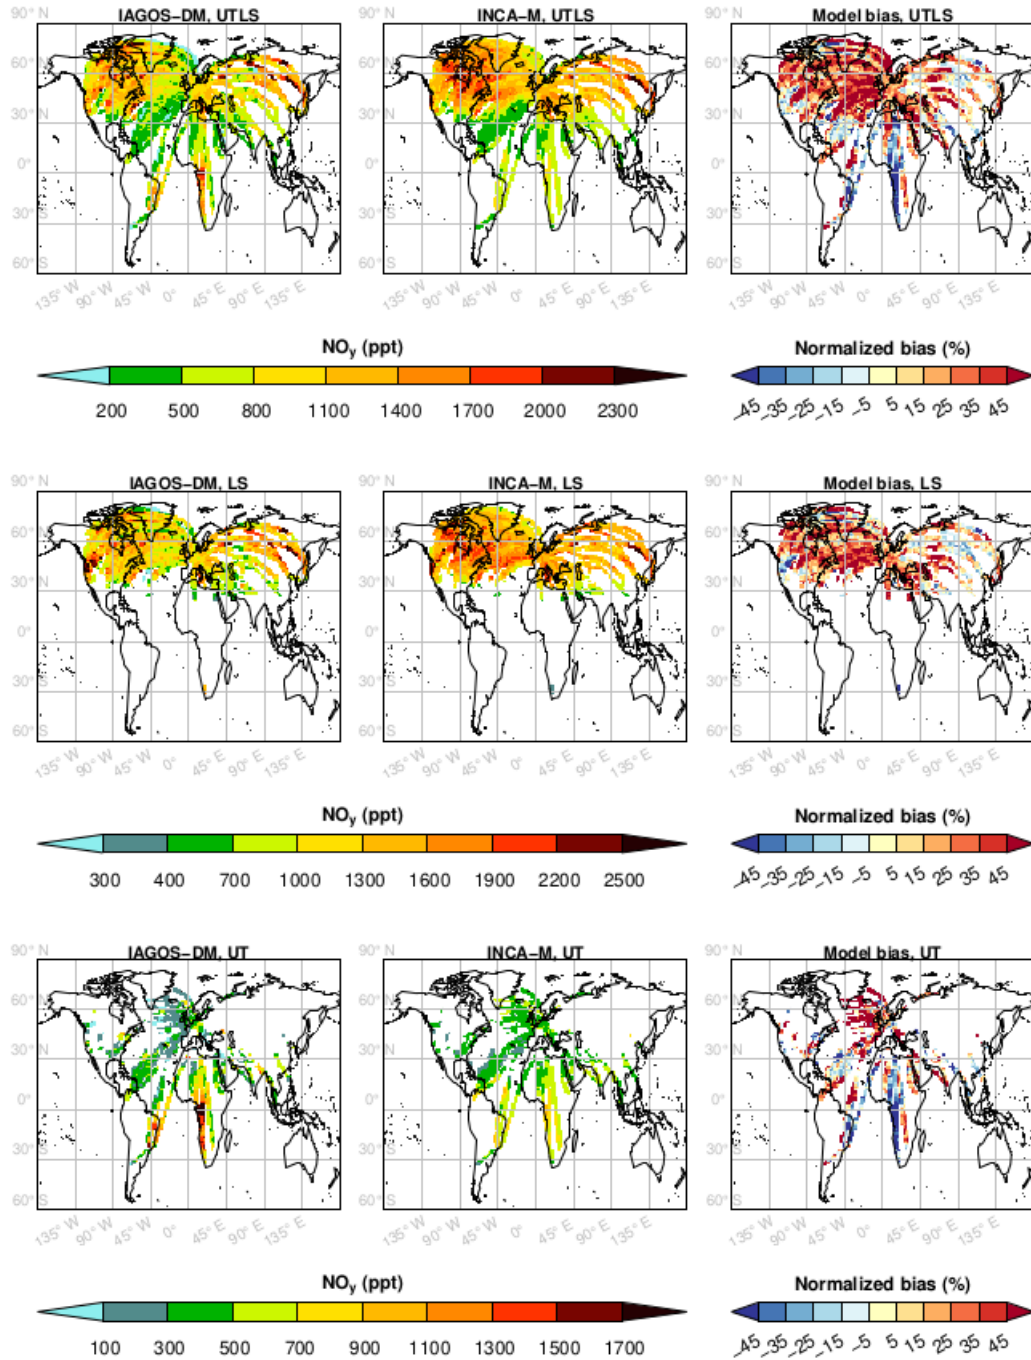

**Figure S9.**  $\text{NO}_y$  mean horizontal distributions during boreal winter from the end of 1999 until 2017, for the products IAGOS-DM (left) and INCA-M (middle), and the biases (right) normalized with respect to the mean values between the two products. Each row displays a layer, with the non-separated UTLS at the top and the distinct LS and UT below.

## NO<sub>y</sub> – MAM

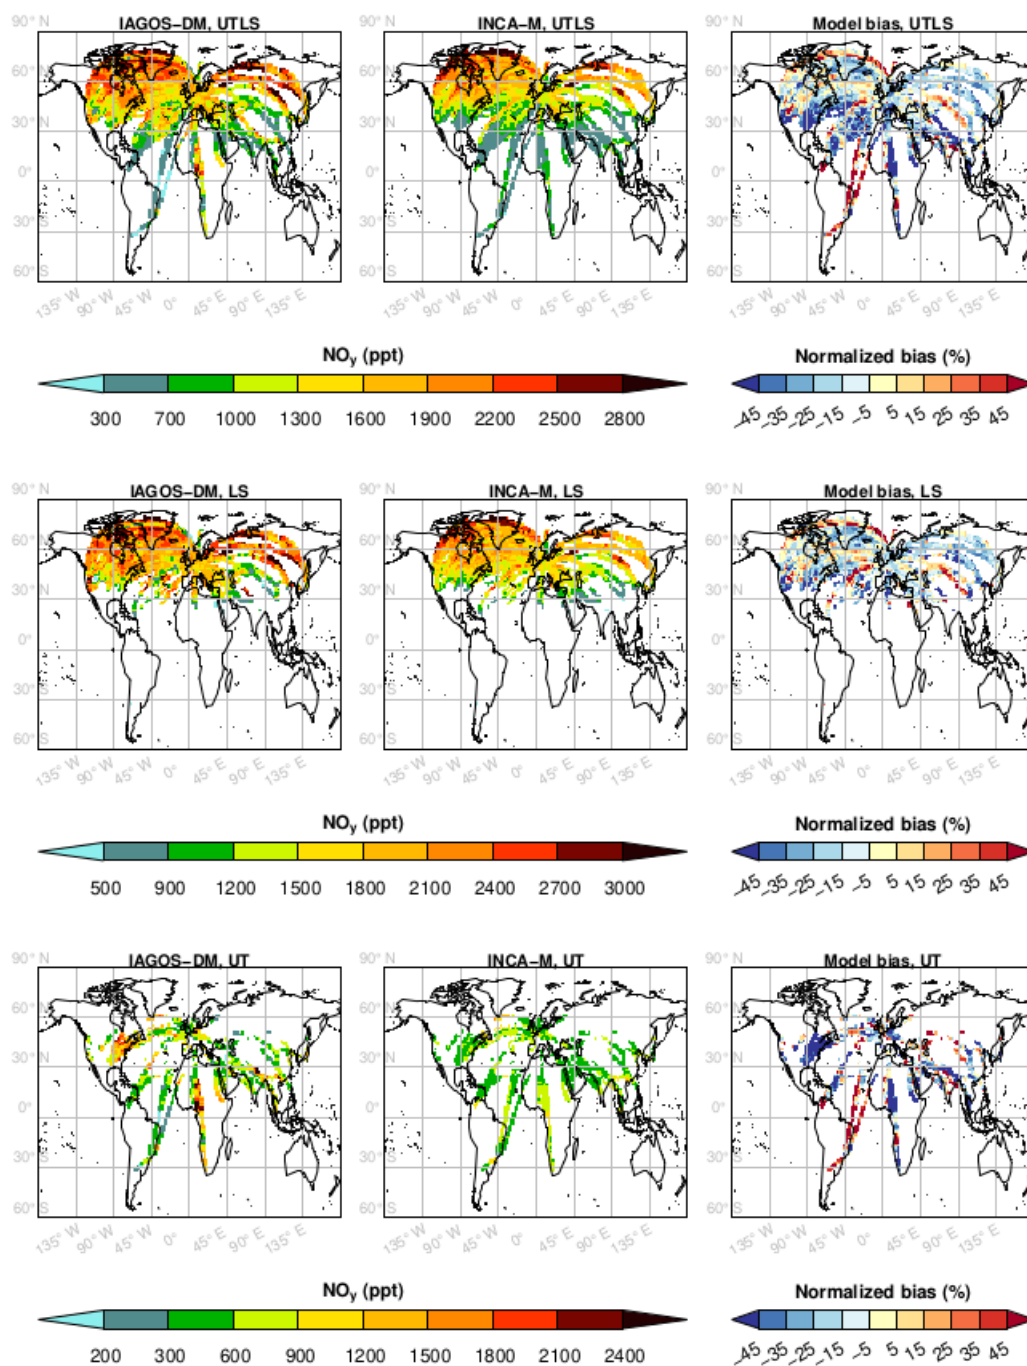

Figure S10. As Fig. S9 for boreal spring.

# $\text{NO}_y$ – JJA

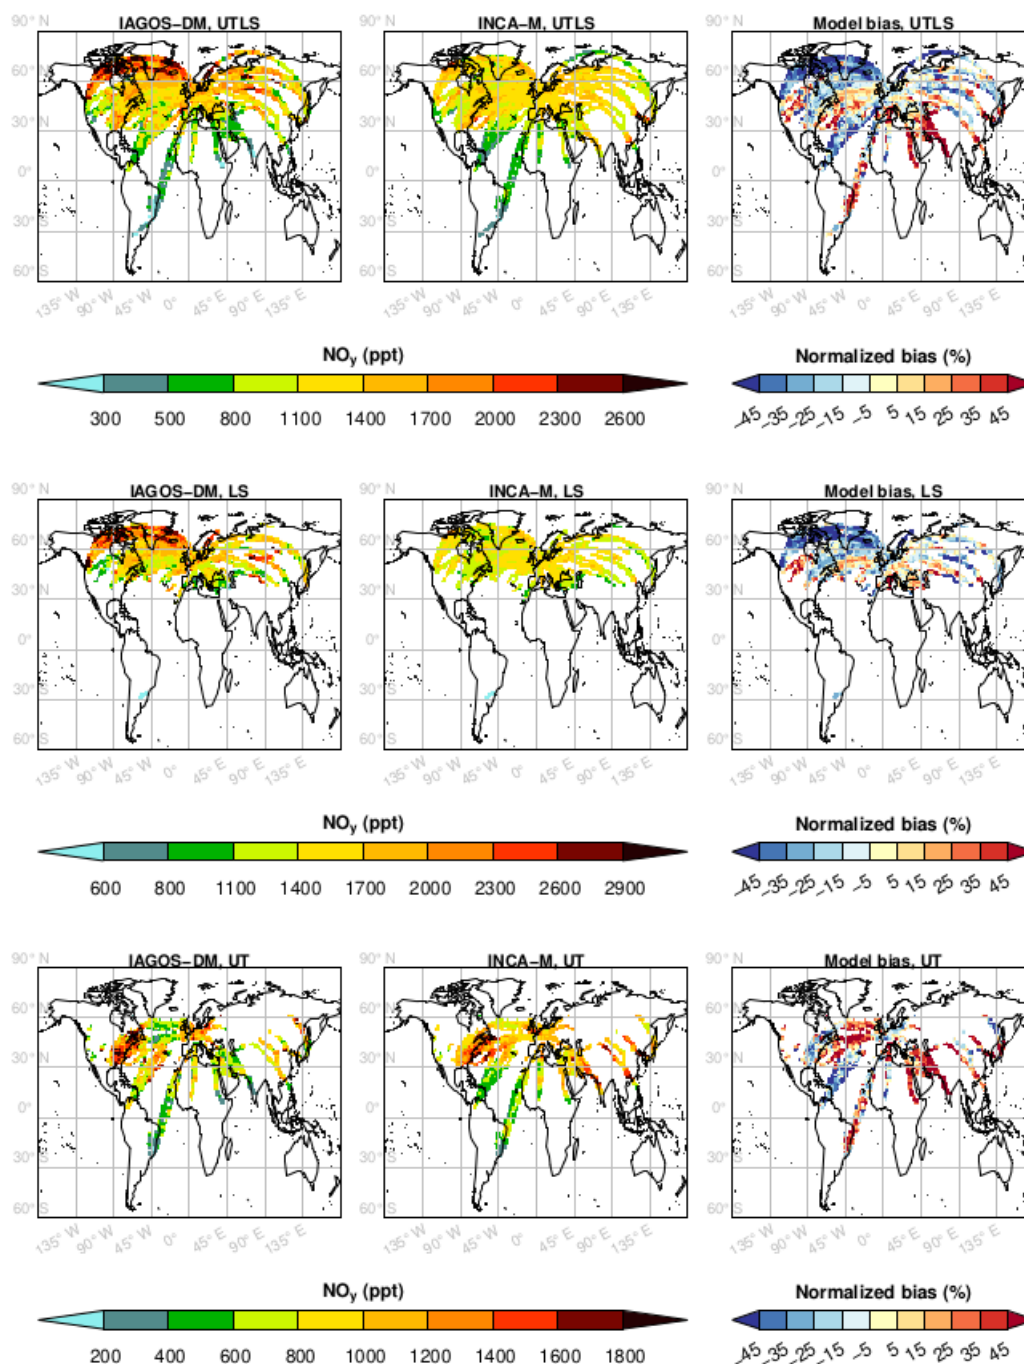

**Figure S11.** As Fig. S9 for boreal summer.

## NO<sub>y</sub> – SON

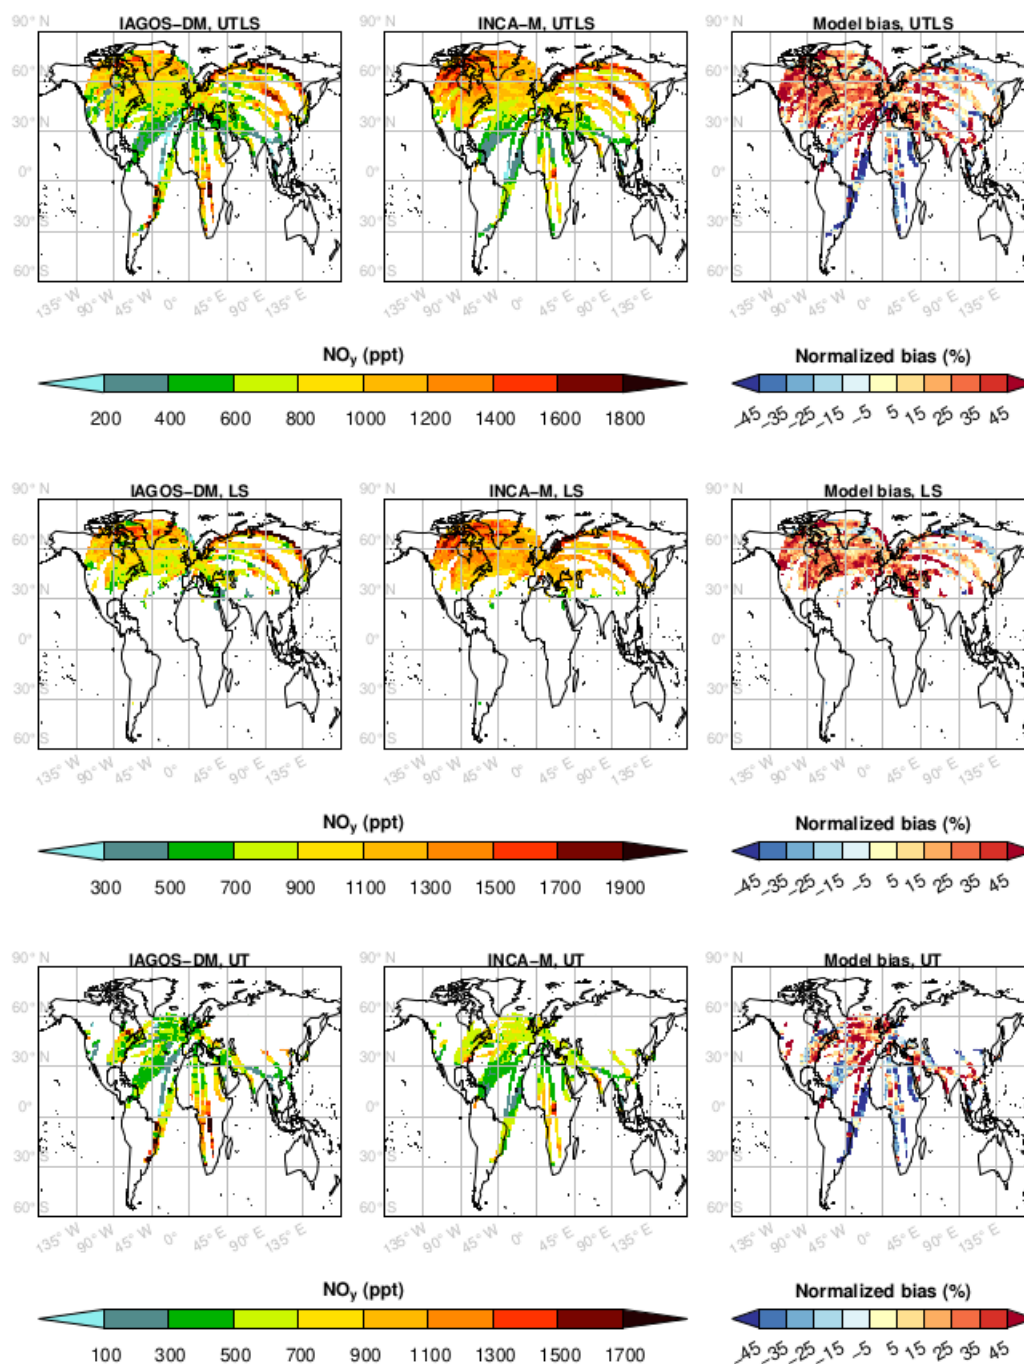

Figure S12. As Fig. S9 for boreal fall.

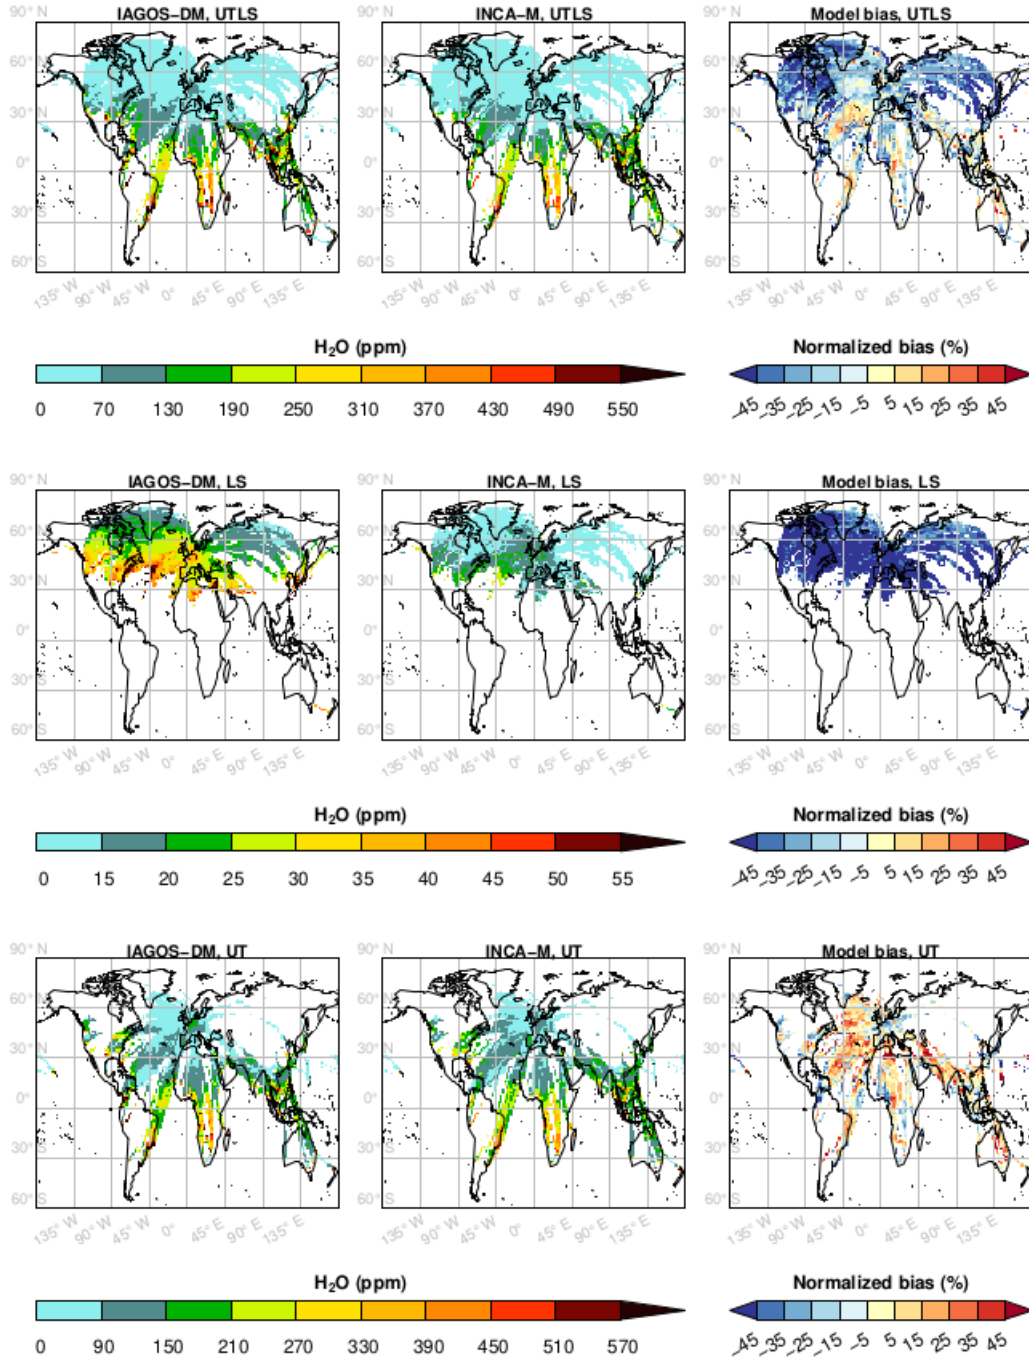

**Figure S13.** Water vapour mean horizontal distributions during boreal winter from the end of 1994 until 2017, for the products IAGOS-DM (left) and INCA-M (middle), and the biases (right) normalized with respect to the mean values between the two products. Each row displays a layer, with the non-separated UTLS at the top and the distinct LS and UT below. Please note that the LS climatology is representative of lower altitudes than for the other species, as explained in the manuscript.

## H<sub>2</sub>O – MAM

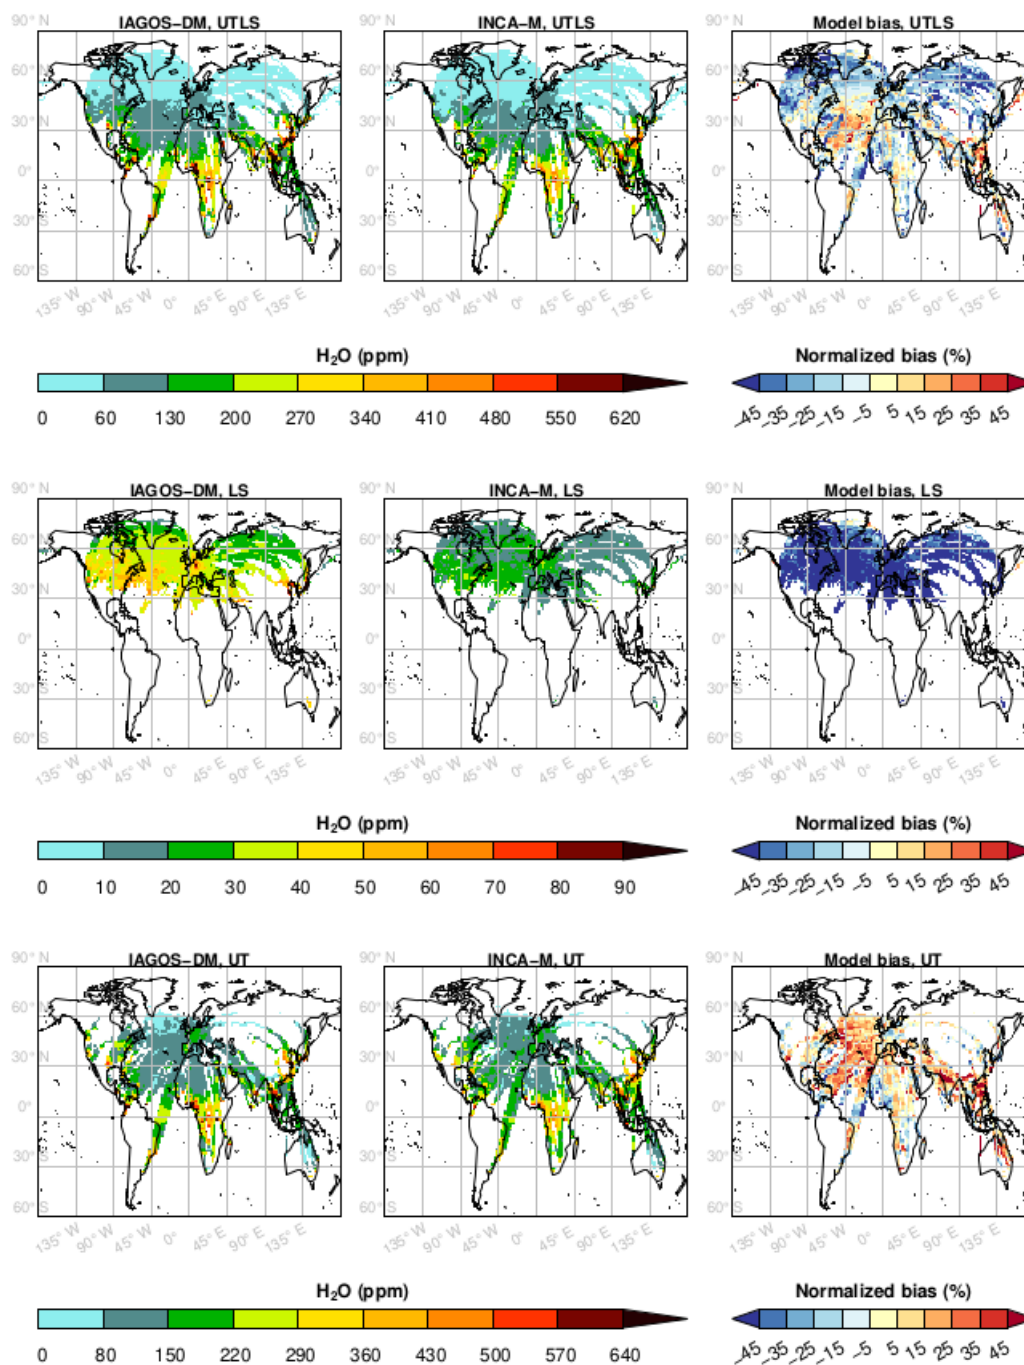

**Figure S14.** As Fig. S13 for boreal spring.

## H<sub>2</sub>O – JJA

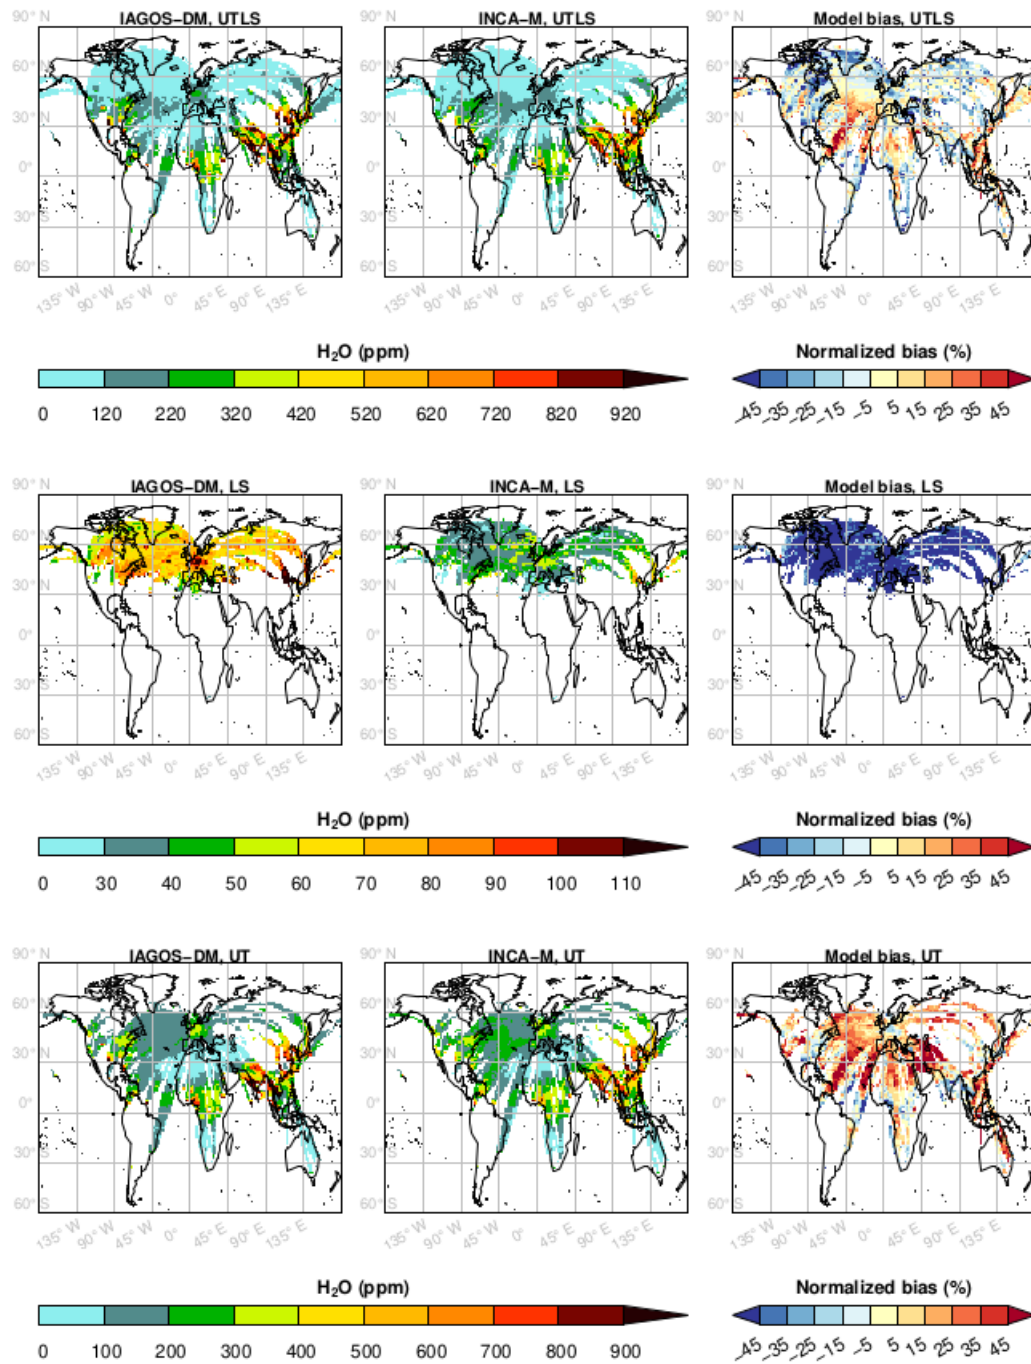

Figure S15. As Fig. S13 for boreal summer.

## H<sub>2</sub>O – SON

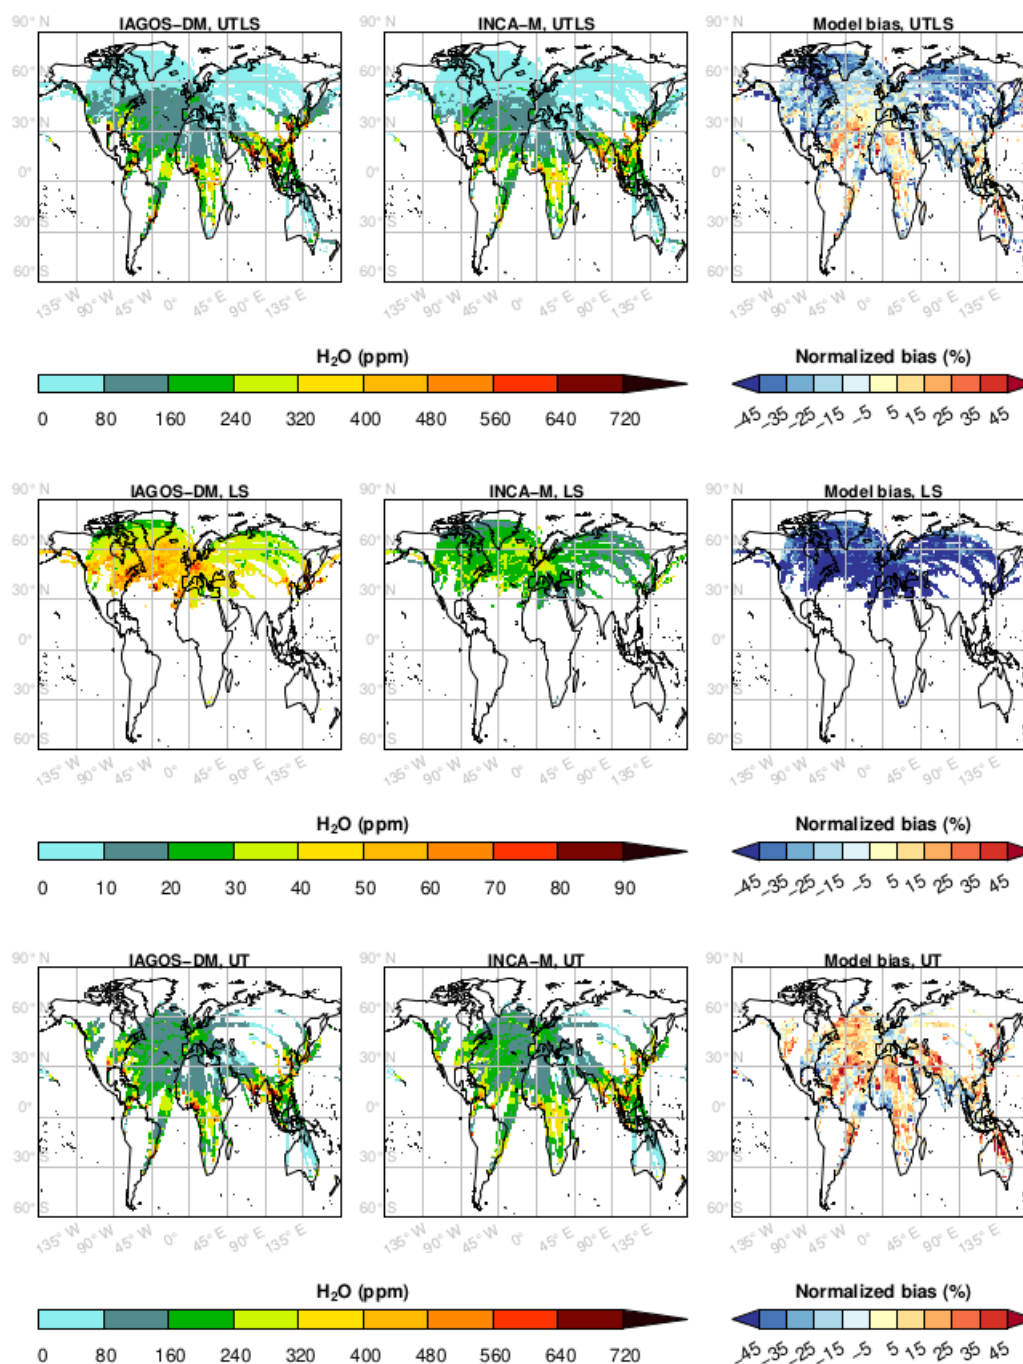

Figure S16. As Fig. S13 for boreal fall.
